# Supplementary material for: Studies on the Interaction of Poly(phenylene methylene) with Silver(I) and Hexacarbonylchromium(0)
Source: MDPI journal article supplement (doi:10.3390/polym14173465), 2022-08-25
Supplement: s1 [file s1]

## Supplementary Material

# Studies on the Interaction of Poly(Phenylene Methylene) with Silver(I) and Hexacarbonylchromium(0)

### 1. Infrared Spectra of PPM, PPM-Cr(CO)<sub>3</sub>, PPM-AgCF<sub>3</sub>SO<sub>3</sub> and PPM-AgClO<sub>4</sub>

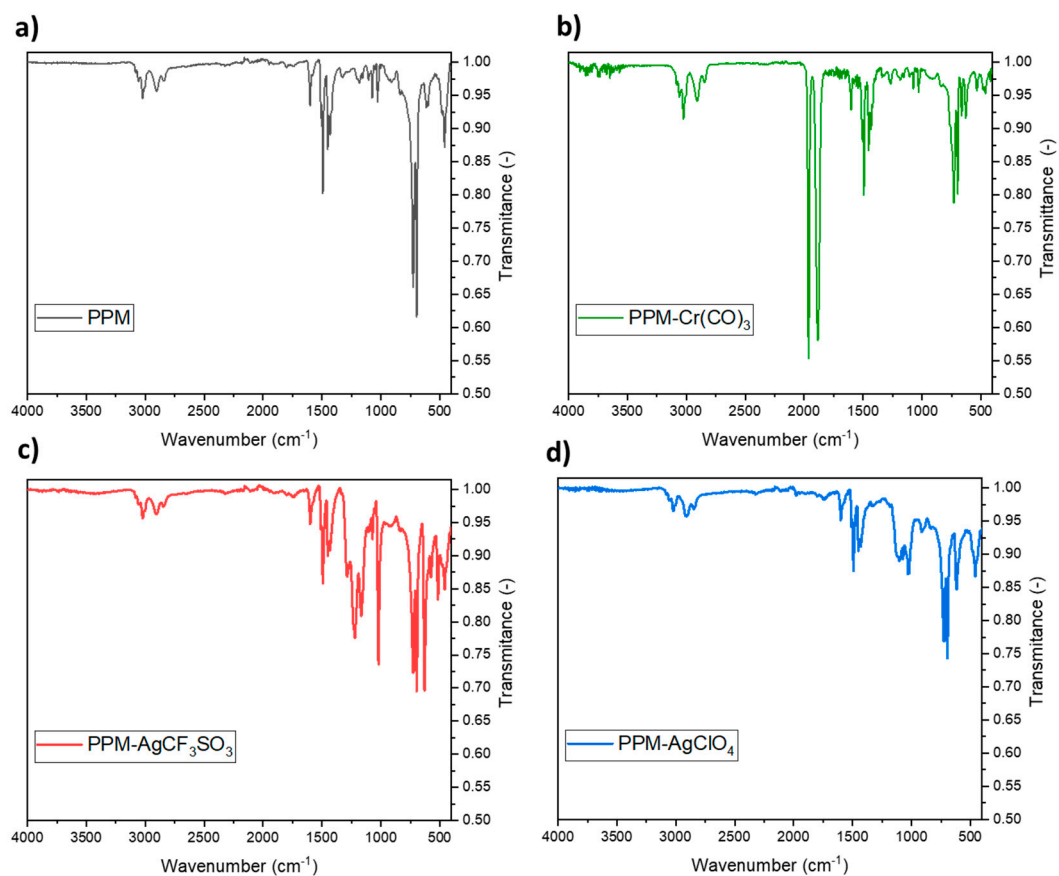

**Figure S1.** IR spectra of (a) poly(phenylene methylene) (PPM), (b) PPM-Cr(CO)<sub>3</sub>, (c) PPM-AgCF<sub>3</sub>SO<sub>3</sub>, and (d) PPM-AgClO<sub>4</sub>.

## 2. Quantitative Determination of Trifluoromethanesulfonate in PPM-AgCF<sub>3</sub>SO<sub>3</sub> by IR Spectroscopy

For quantitative comparisons, first a linear baseline correction was performed on the basis of the two transmittance values at 4000 cm<sup>-1</sup> and 3200 cm<sup>-1</sup>, using the Formula (S1).

$$T_b = 1 + T - T_1 - (\nu - \nu_1) \frac{T_2 - T_1}{\nu_2 - \nu_1} \quad (S1)$$

with  $T_b$  the transmittance after baseline correction at the frequency  $\nu$ ,  $T$  the transmittance before baseline correction at the frequency  $\nu$ , and  $T_1$  and  $T_2$  the transmittances at the frequencies  $\nu_1$  (4000 cm<sup>-1</sup>) and  $\nu_2$  (3200 cm<sup>-1</sup>), respectively. Subsequently, the peak at 1493 cm<sup>-1</sup> in the spectrum of PPM itself was used as a reference for internal calibration. Importantly, the position of this peak was not affected in the products of PPM with the silver salts. Its transmittance was arbitrarily set to 0.8 and the transmittances at the other frequencies were adjusted accordingly, using the Formula (S2).

$$T_c = 1 - 0.2 \frac{1 - T_b}{1 - T_{b,ref}} \quad (S2)$$

with  $T_c$  the transmittance after calibration at the frequency  $\nu$ , and  $T_{b,ref}$  the transmittance at the reference frequency (1493 cm<sup>-1</sup>). The effects of baseline correction and calibration on the IR spectrum of PPM are illustrated on the example of PPM itself in Figure S2.

Calibrated IR spectra of PPM-AgCF<sub>3</sub>SO<sub>3</sub> with different concentrations of the silver salt (1% w/w – 30% w/w and neat AgCF<sub>3</sub>SO<sub>3</sub>) are displayed in Figure S3. Figure S3 (c) shows that the intensity of five characteristic bands of the trifluoromethanesulfonate (1290 cm<sup>-1</sup>, 1236 cm<sup>-1</sup>, 1022 cm<sup>-1</sup>, 633 cm<sup>-1</sup> and 517 cm<sup>-1</sup>) is proportional to the concentration of silver salt, thus allowing quantitative determination of the silver salt in PPM-AgCF<sub>3</sub>SO<sub>3</sub> compositions.

It is also evident from Figure S3 that the bands of trifluoromethanesulfonate are sharper in the PPM-silver(I) materials than in silver(I) trifluoromethanesulfonate and also shifted to some extent, which may indicate that the interaction of trifluoromethanesulfonate with silver(I) is influenced by the coordination of the silver(I) ions in PPM.

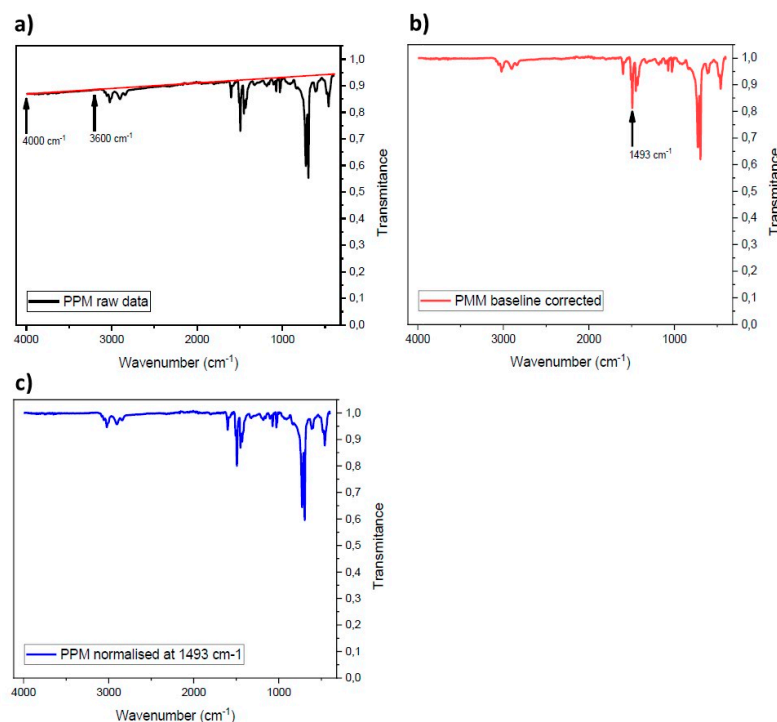

**Figure S2.** Successive data treatment of IR spectra of PPM. (a) spectrum as received, (b) spectrum with subtracted baseline, (c) normalized spectrum.

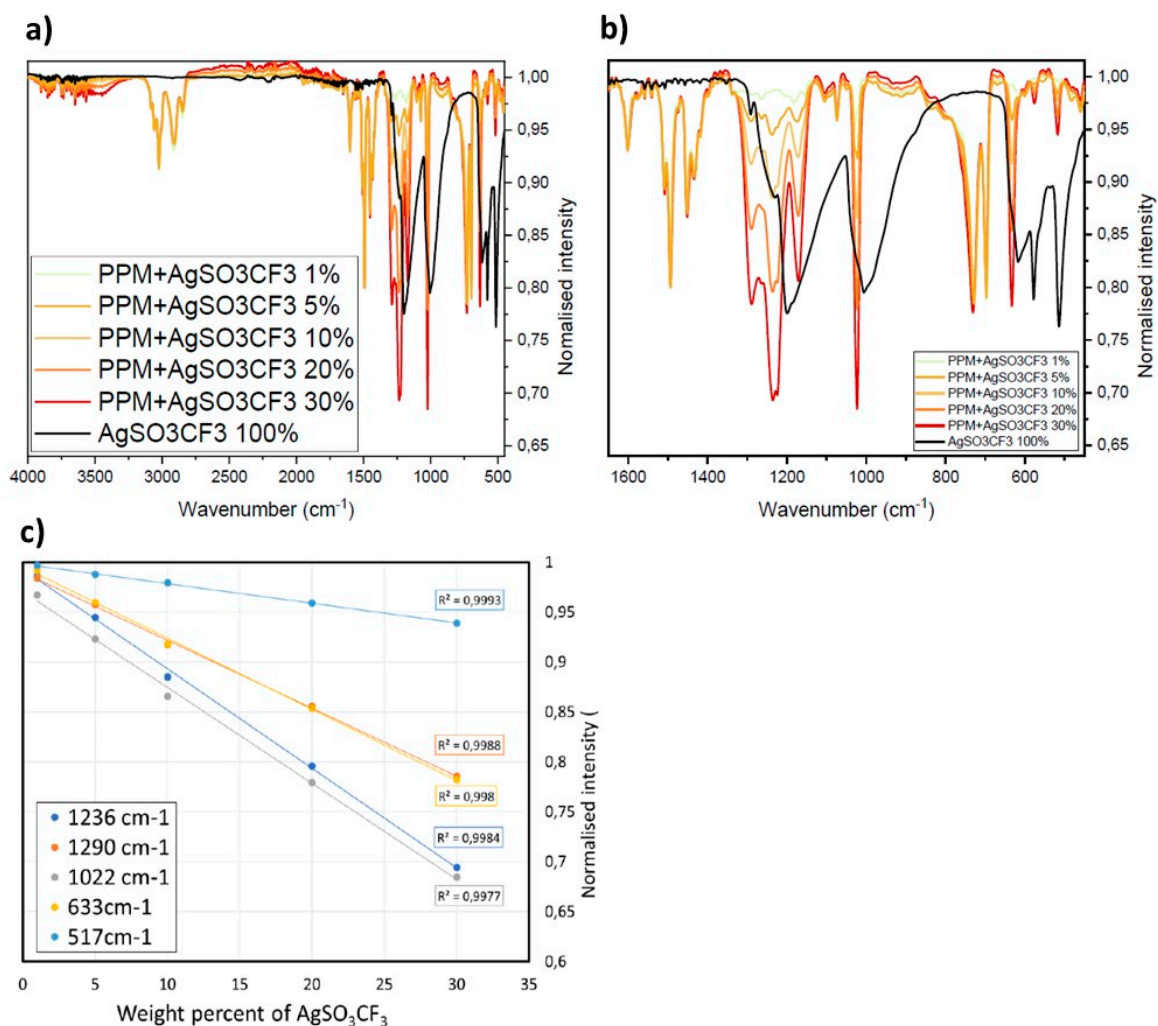

**Figure S3.** Influence of  $\text{AgSO}_3\text{CF}_3$  salt concentration on IR spectra of PPM- $\text{AgSO}_3\text{CF}_3$ . (a) Spectra normalized at  $1493\text{ cm}^{-1}$  for weight percent in salt of 1 %, 5 %, 10 %, 20 %, 30 % and 100 % (i.e. the neat silver salt) for two wavenumber intervals ( $4000\text{ cm}^{-1}$  -  $400\text{ cm}^{-1}$  and (b)  $1650\text{ cm}^{-1}$  -  $400\text{ cm}^{-1}$ ). (c) Linear regression with regression coefficient  $R^2$  for different characteristic peaks of trifluoromethanesulfonate:  $1290\text{ cm}^{-1}$  (orange line and dots,  $R^2=0.999$ ),  $1236\text{ cm}^{-1}$  (dark blue line and dots,  $R^2=0.998$ ),  $1022\text{ cm}^{-1}$  (grey line and dots,  $R^2=0.998$ ),  $633\text{ cm}^{-1}$  (yellow line and dots,  $R^2=0.998$ ),  $517\text{ cm}^{-1}$  (blue line and dots,  $R^2=0.999$ ).

### 3. $^{13}\text{C}$ -NMR spectra of PPM, PPM- $\text{AgCF}_3\text{SO}_3$ and PPM- $\text{AgClO}_4$

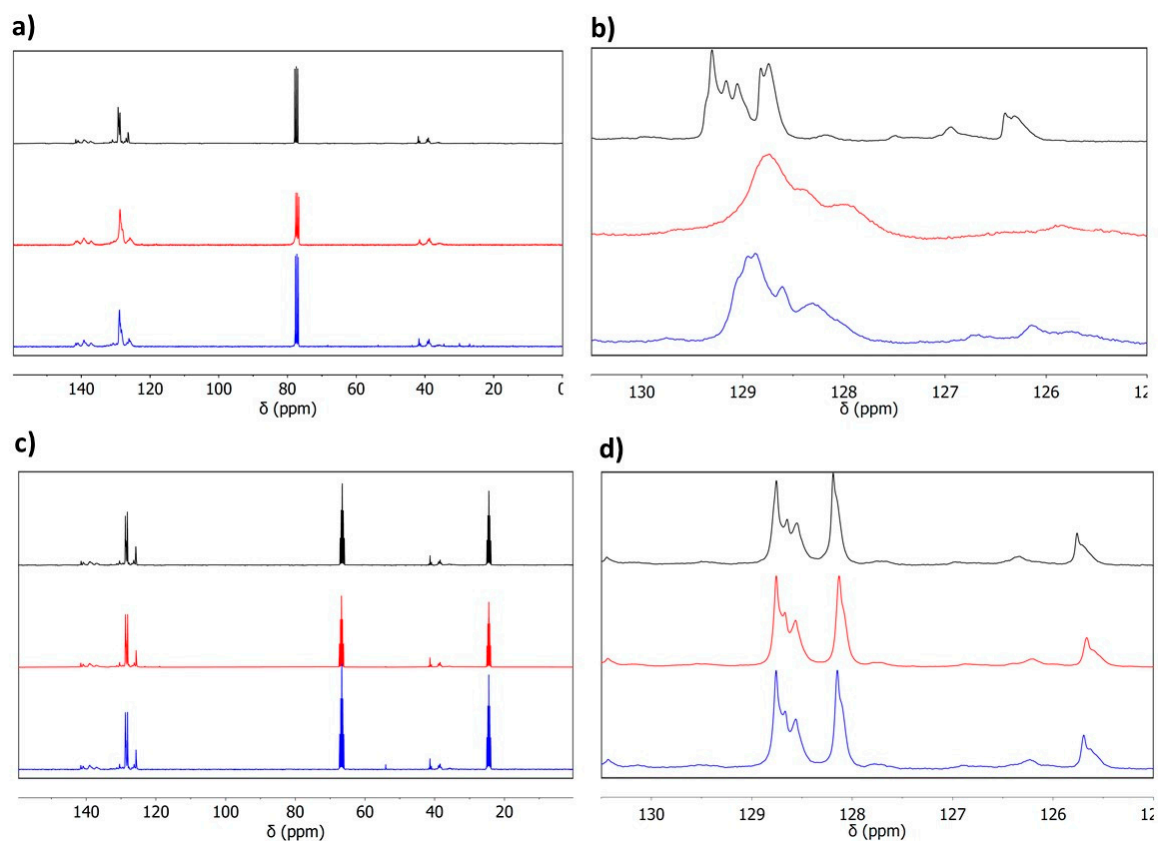

**Figure S4.**  $^{13}\text{C}$  NMR spectra of PPM (black), PPM- $\text{AgCF}_3\text{SO}_3$  (red) and PPM- $\text{AgClO}_4$  (blue) in chloroform (a) and extended aromatic region (b), and in tetrahydrofuran (THF) (c) and extended aromatic region (d).

### 4. $^1\text{H}$ -NMR spectra of PPM, PPM- $\text{AgCF}_3\text{SO}_3$ and PPM- $\text{AgClO}_4$

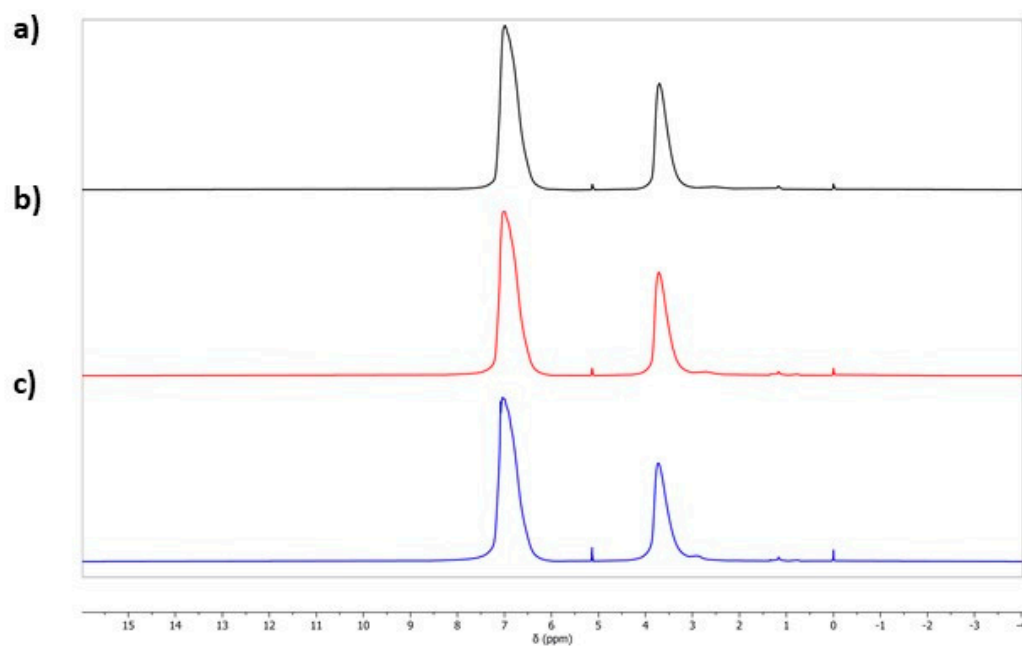

**Figure S5.**  $^1\text{H}$  NMR spectra in chloroform, (a) PPM, (b) PPM- $\text{AgCF}_3\text{SO}_3$  and (c) PPM- $\text{AgClO}_4$ .
